# Supplementary material
Source: PubMed Central journal article supplement (PMC11614054)
Supplement: NA-006-D4NA00684D-s001.pdf [file NA-006-D4NA00684D-s001.pdf]

## Supporting information

# SnS/MnSe Heterostructures for Enhanced Optoelectronics and Dielectric Applications

Abinash Parida<sup>1</sup>, Satish Kumar Samal<sup>2</sup>, Sripan Chinnaiah<sup>3</sup>, Ramakanta Naik<sup>1\*</sup>

<sup>1</sup>*Department of Engineering and Materials Physics, ICT-IOC Bhubaneswar, 751013, India*

<sup>2</sup>*Department of Electronics and Communication Engineering, Siksha 'O' Anusandhan,  
Bhubaneswar 751030, India*

<sup>3</sup>*Crystal Growth and Thin Film Laboratory, Department of Physics, Bharathidasan  
University, Tiruchirappalli-620024, Tamil Nadu, India*

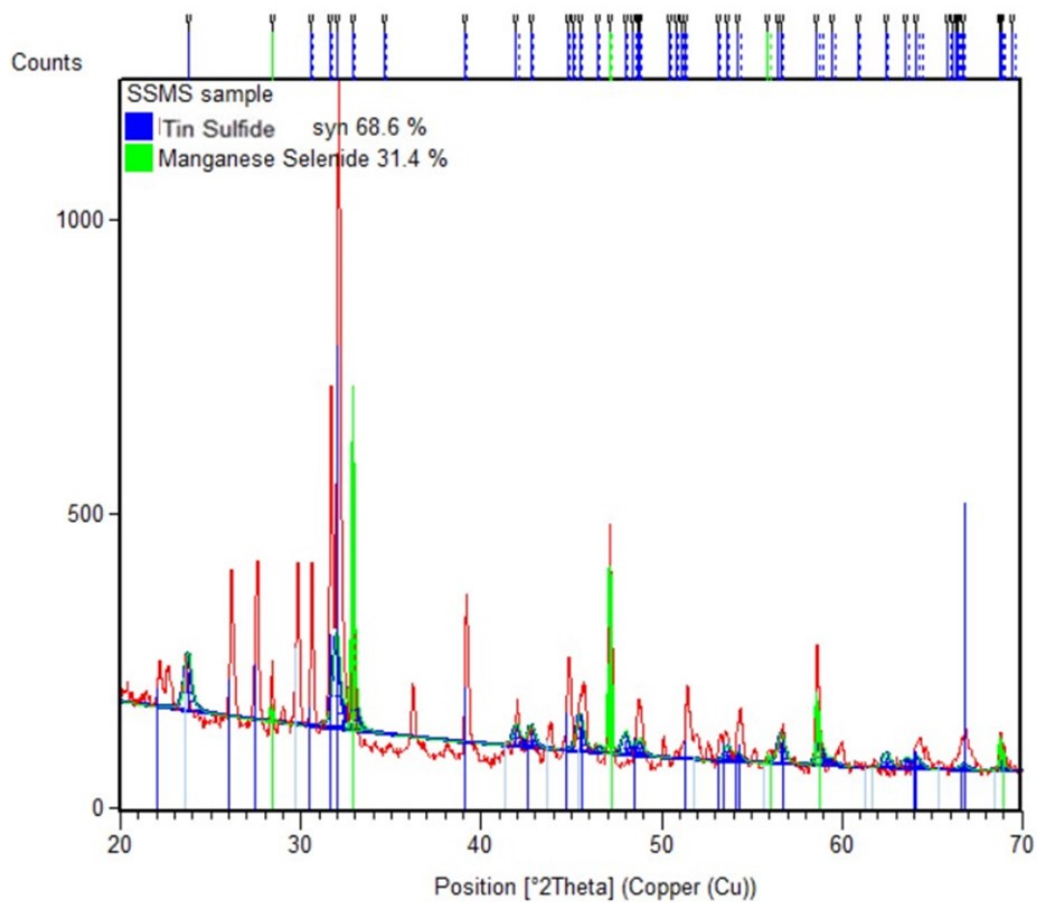

**Fig. S1.** Rietveld refinement of XRD pattern for SSMS sample.

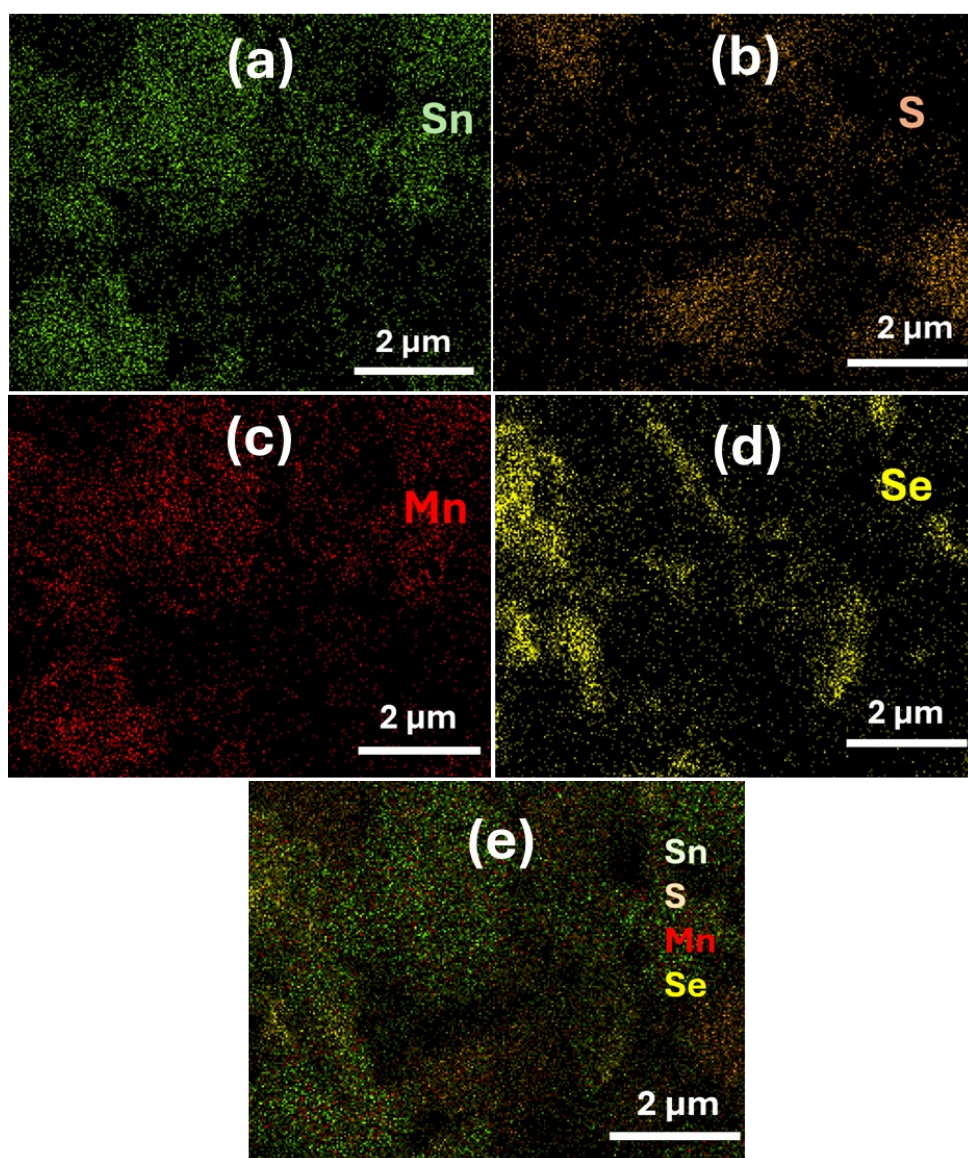

**Fig. S2.** Elemental mapping of (a) element Sn, (b) element S, (c) element Mn, (d) element Se, and (e) all the constituent elements of SSMS heterostructure sample.

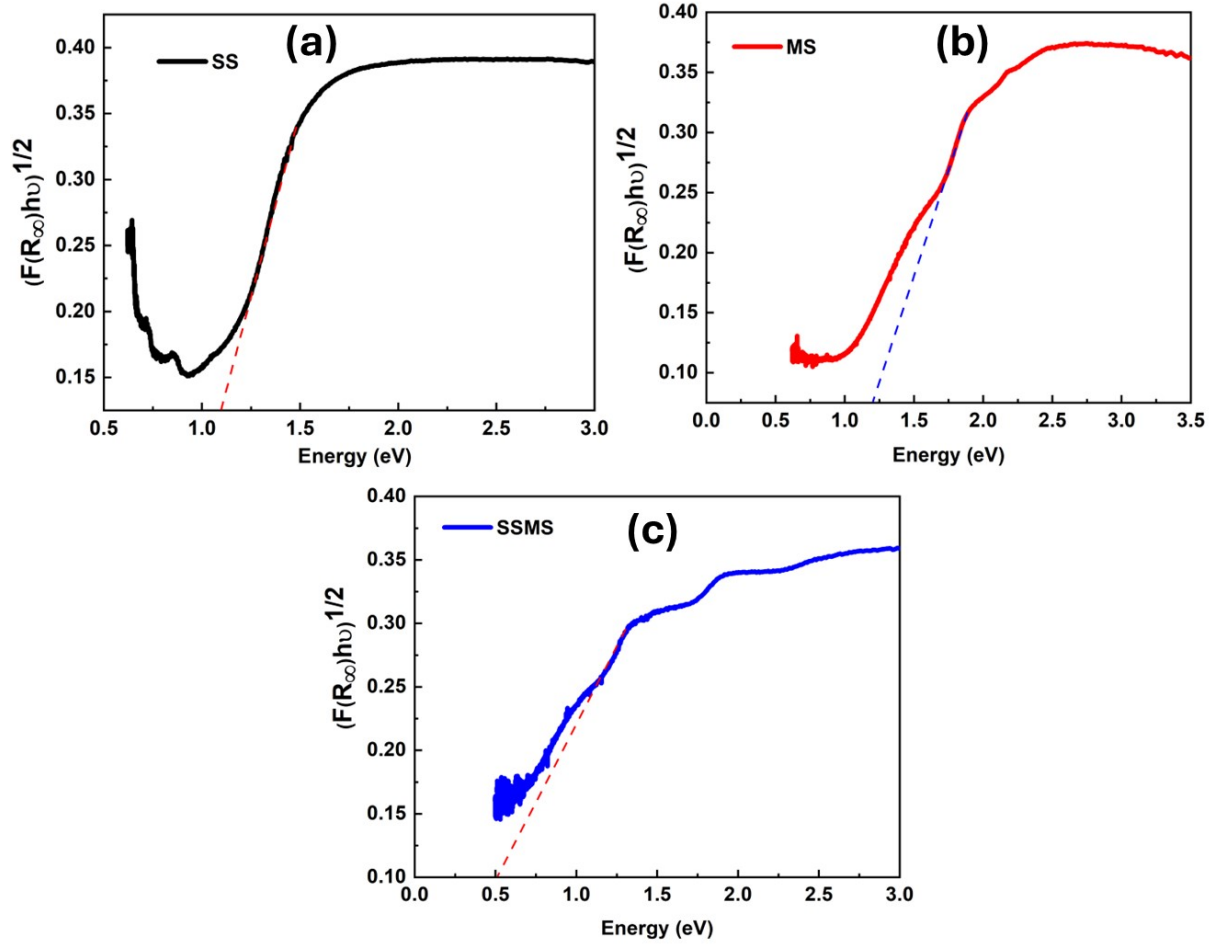

**Fig. S3:** Calculation of (a) indirect bandgap of SS, (b) indirect bandgap of MS, and (c) indirect bandgap of SSMS heterostructure respectively.

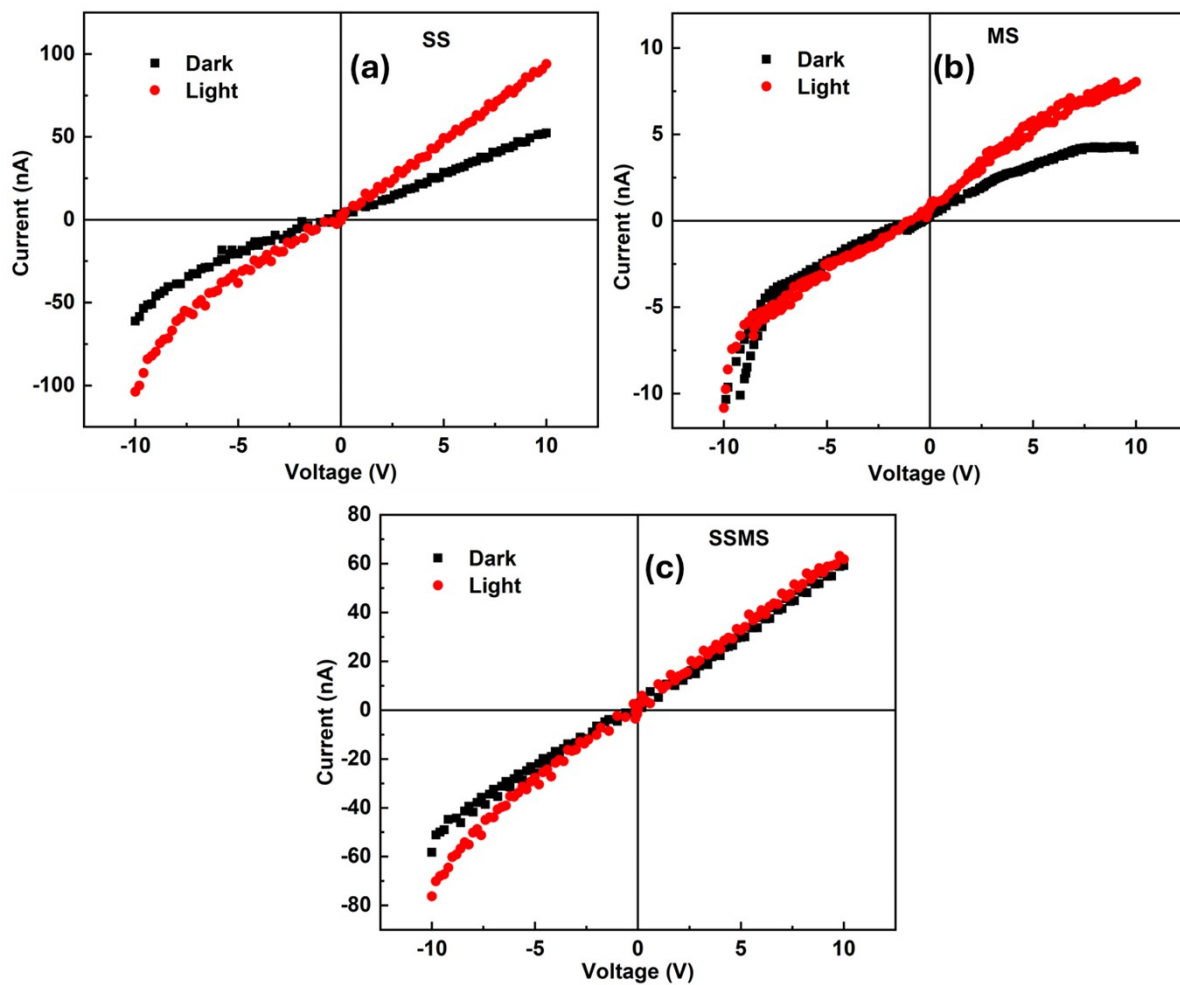

**Fig S4:** Comparative plot of the light and dark current of (a) SS sample, (b) MS sample, and (c) SSMS heterostructure sample.

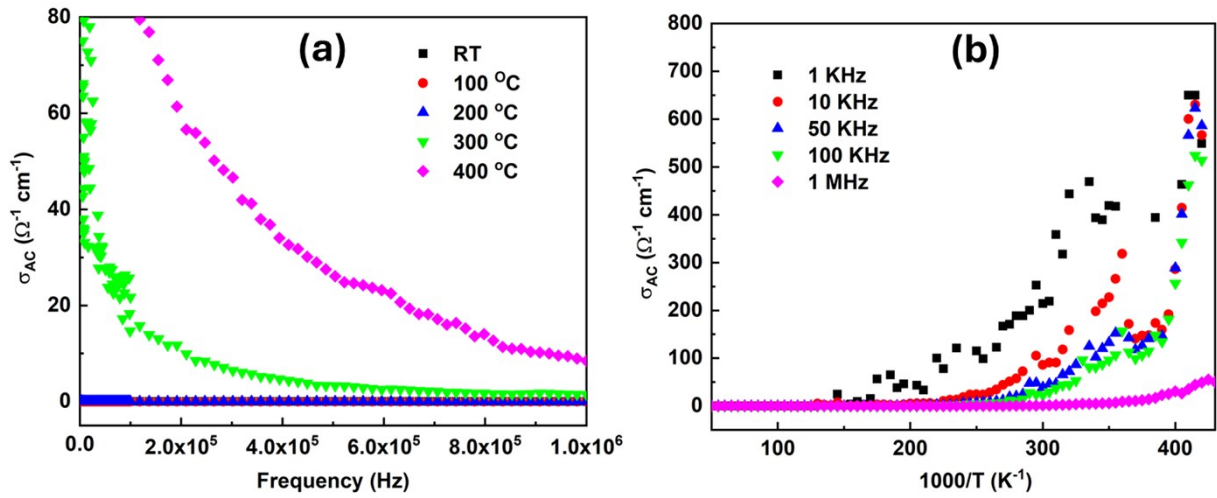

**Fig. S5:** (a) AC conductivity at different temperatures as a function of frequency. (b) AC conductivity's temperature response when the frequency is changed of SSMS heterostructure sample.

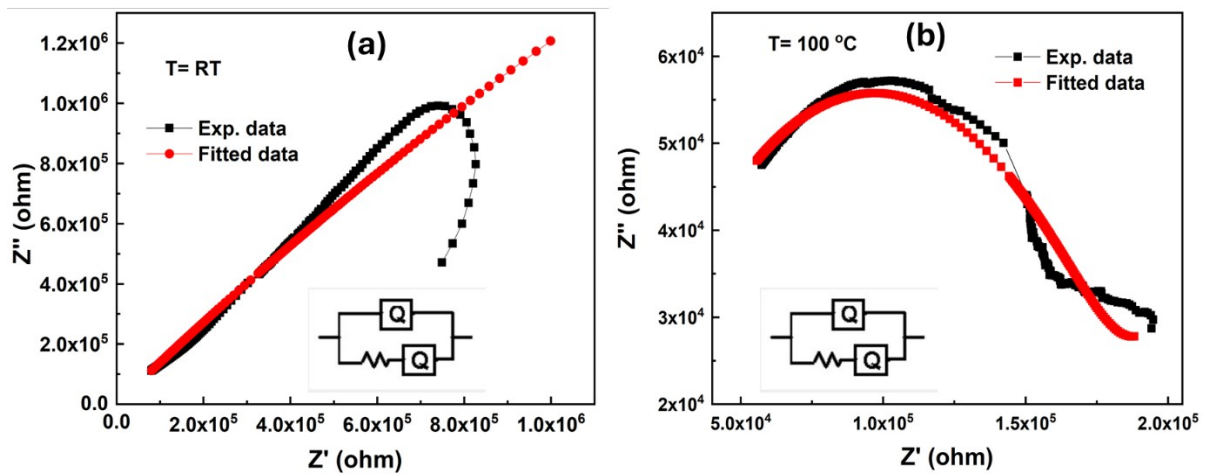

**Fig. S6:** Cole–Cole plot of SSMS sample sintered at different sintering temperatures (a)  $T = \text{RT}$  (b)  $100 \text{ }^\circ\text{C}$ . The equivalent circuit configuration (Q(RQ)) is shown in the inset figures.

| <b>Samples</b> | <b>Sn (At%)</b> | <b>Mn (At%)</b> | <b>S (At%)</b> | <b>Se (At%)</b> | <b>Total</b> |
|----------------|-----------------|-----------------|----------------|-----------------|--------------|
| <b>SS</b>      | <b>38.4</b>     | <b>-</b>        | <b>61.6</b>    | <b>-</b>        | <b>100</b>   |
| <b>MS</b>      | <b>-</b>        | <b>65.2</b>     | <b>-</b>       | <b>34.8</b>     | <b>100</b>   |
| <b>SSMS</b>    | <b>27.1</b>     | <b>28.3</b>     | <b>19.4</b>    | <b>25.2</b>     | <b>100</b>   |

**Table S1:** Atomic percentage of constituent elements.
